# Supplementary material
Source: Frontiers journal article supplement (https://www.frontiersin.org/articles/570350)
Supplement: Data_Sheet_1.PDF [file Data_Sheet_1.PDF]

## *Supplementary Material*

# **Nucleotide Analog ARL67156 as a Lead Structure for the Development of CD39 and Dual CD39/CD73 Ectonucleotidase Inhibitors**

**Laura Schäkel<sup>1,#</sup>, Constanze C. Schmies<sup>1,#</sup>, Riham M. Idris<sup>1</sup>, Xihuan Luo<sup>1</sup>, Sang-Yong Lee<sup>1</sup>, Vittoria Lopez<sup>1</sup>, Salahuddin Mirza<sup>1</sup>, The Hung Vu<sup>1</sup>, Julie Pelletier<sup>2</sup>, Jean Sévigny<sup>2,3</sup>, Vigneshwaran Namasivayam<sup>1</sup> and Christa E. Müller<sup>1,\*</sup>**

<sup>1</sup> PharmaCenter Bonn, Pharmaceutical Institute, Pharmaceutical Sciences Bonn (PSB), Pharmaceutical & Medicinal Chemistry, University of Bonn, Germany

<sup>2</sup> Centre de Recherche du CHU de Québec – Université Laval, Québec City, QC, Canada

<sup>3</sup> Département de Microbiologie-Infectiologie et d'Immunologie, Faculté de Médecine, Université Laval, Québec City, QC, Canada

<sup>#</sup> These authors contributed equally to this work

### **\* Correspondence:**

Christa E. Müller  
Pharmaceutical Institute, Pharmaceutical & Medicinal Chemistry,  
An der Immenburg 4, D-53121 Bonn, Germany  
E-mail: christa.mueller@uni-bonn.de  
Tel: +49-228-73-2301  
Fax: +49-228-73-2567

### **Table of contents**

| <b>Contents</b>                                                                             | <b>Page</b> |
|---------------------------------------------------------------------------------------------|-------------|
| <b>Figures S1-S2.</b> NMR data of selected compounds                                        | S2-S3       |
| <b>Figures S3-S5.</b> LC-MS data of selected compounds                                      | S4-S6       |
| <b>Figures S6-S7</b> MS data with isotope distribution of selected compounds                | S7-S8       |
| <b>Figure S8.</b> Metabolic stability of selected compounds                                 | S9          |
| <b>Figure S9.</b> 2D-interaction diagrams of nucleotides in the binding site of human CD39  | S10-S11     |
| <b>Figure S10.</b> 2D-interaction diagrams of nucleotides in the binding site of human CD73 | S12-S13     |

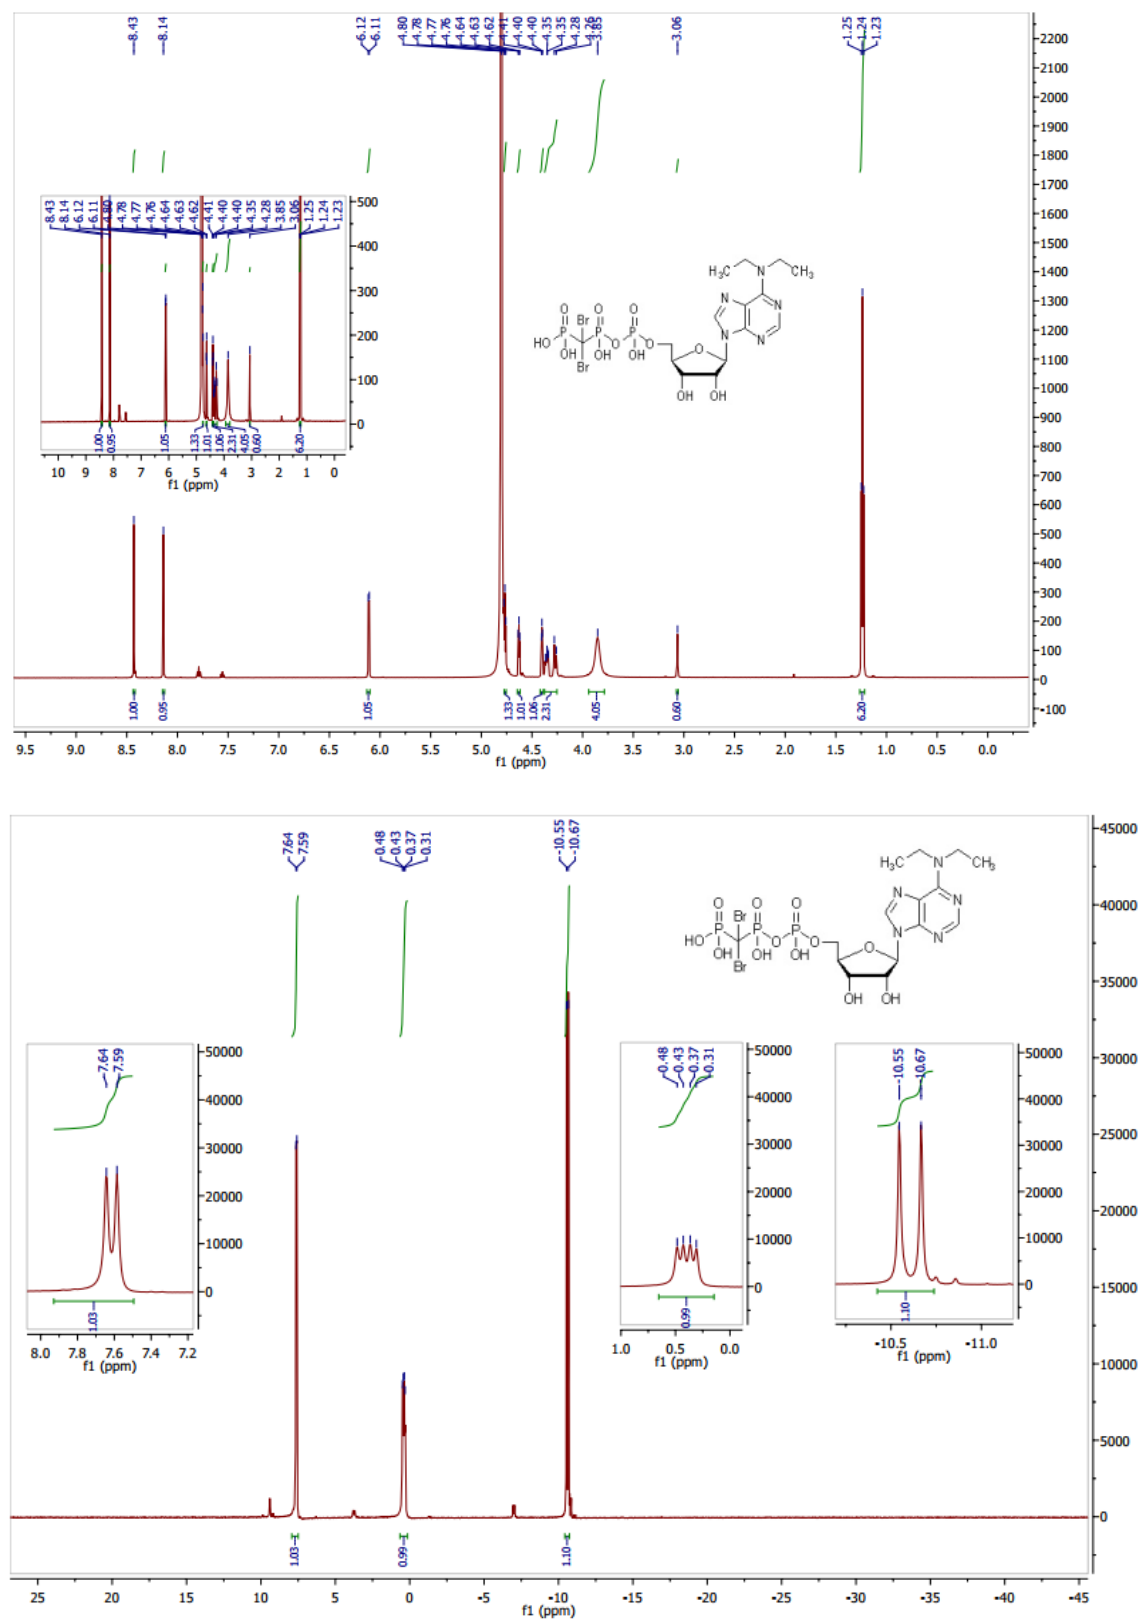

**Figure S1.**  $^1\text{H}$  (500 MHz) and  $^{31}\text{P}$  (202 MHz) spectra of synthesized ARL67156 (I)

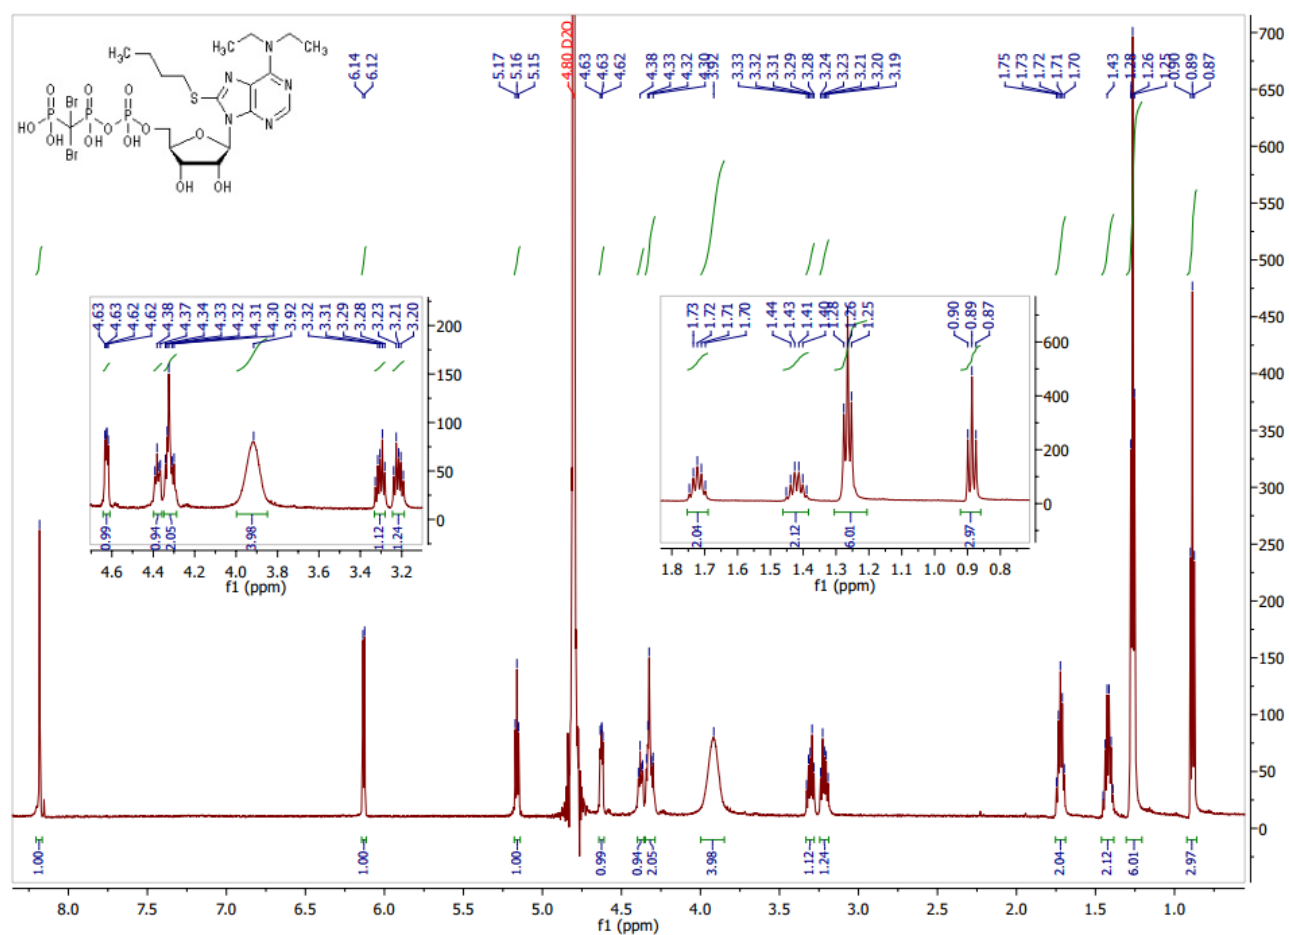

**Figure S2.** <sup>1</sup>H NMR spectrum (500 MHz) of (dibromo((((((2*R*,3*S*,4*R*,5*R*)-5-(8-(butylthio)-6-(diethylamino)-9*H*-purin-9-yl)-3,4-dihydroxy-tetrahydrofuran-2-yl)methoxy)(hydroxy)phosphoryl)-oxy)(hydroxy)phosphoryl)methyl)phosphonic acid (**37**)

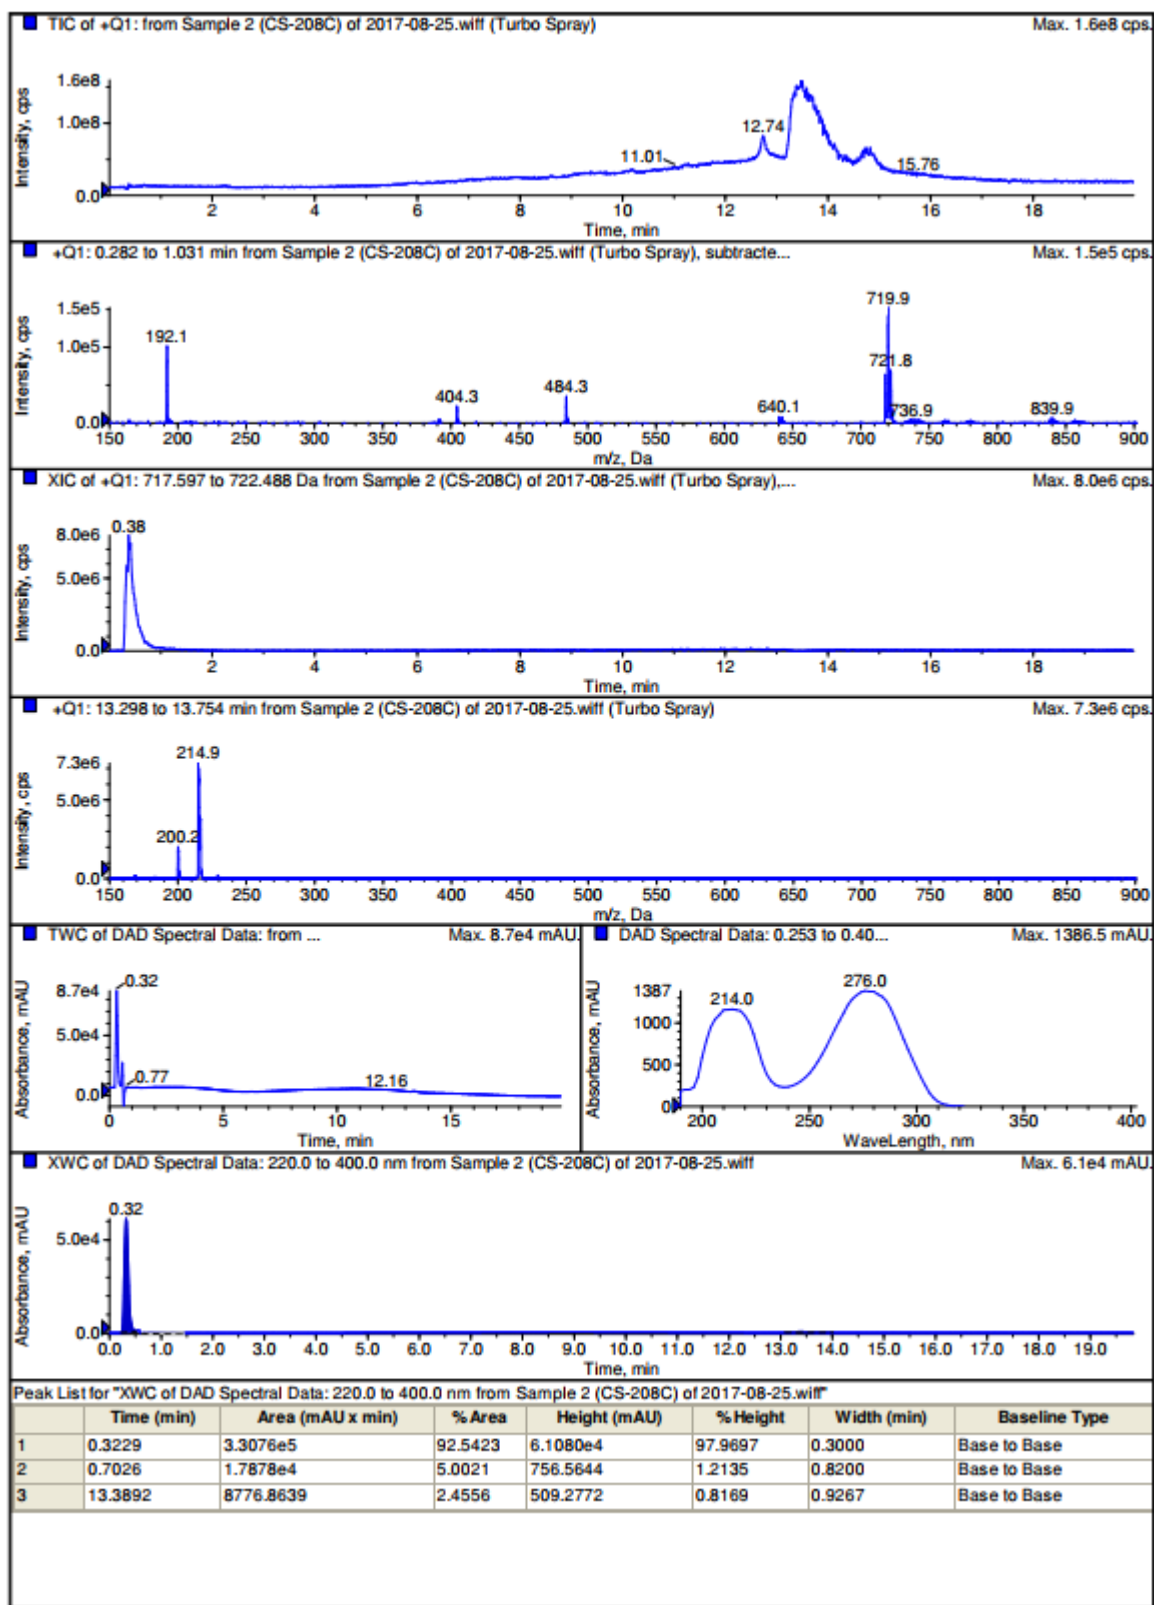

**Figure S3.** LC-MS spectrum of synthesized ARL67156 (I). The purity of compound I was 97.5%

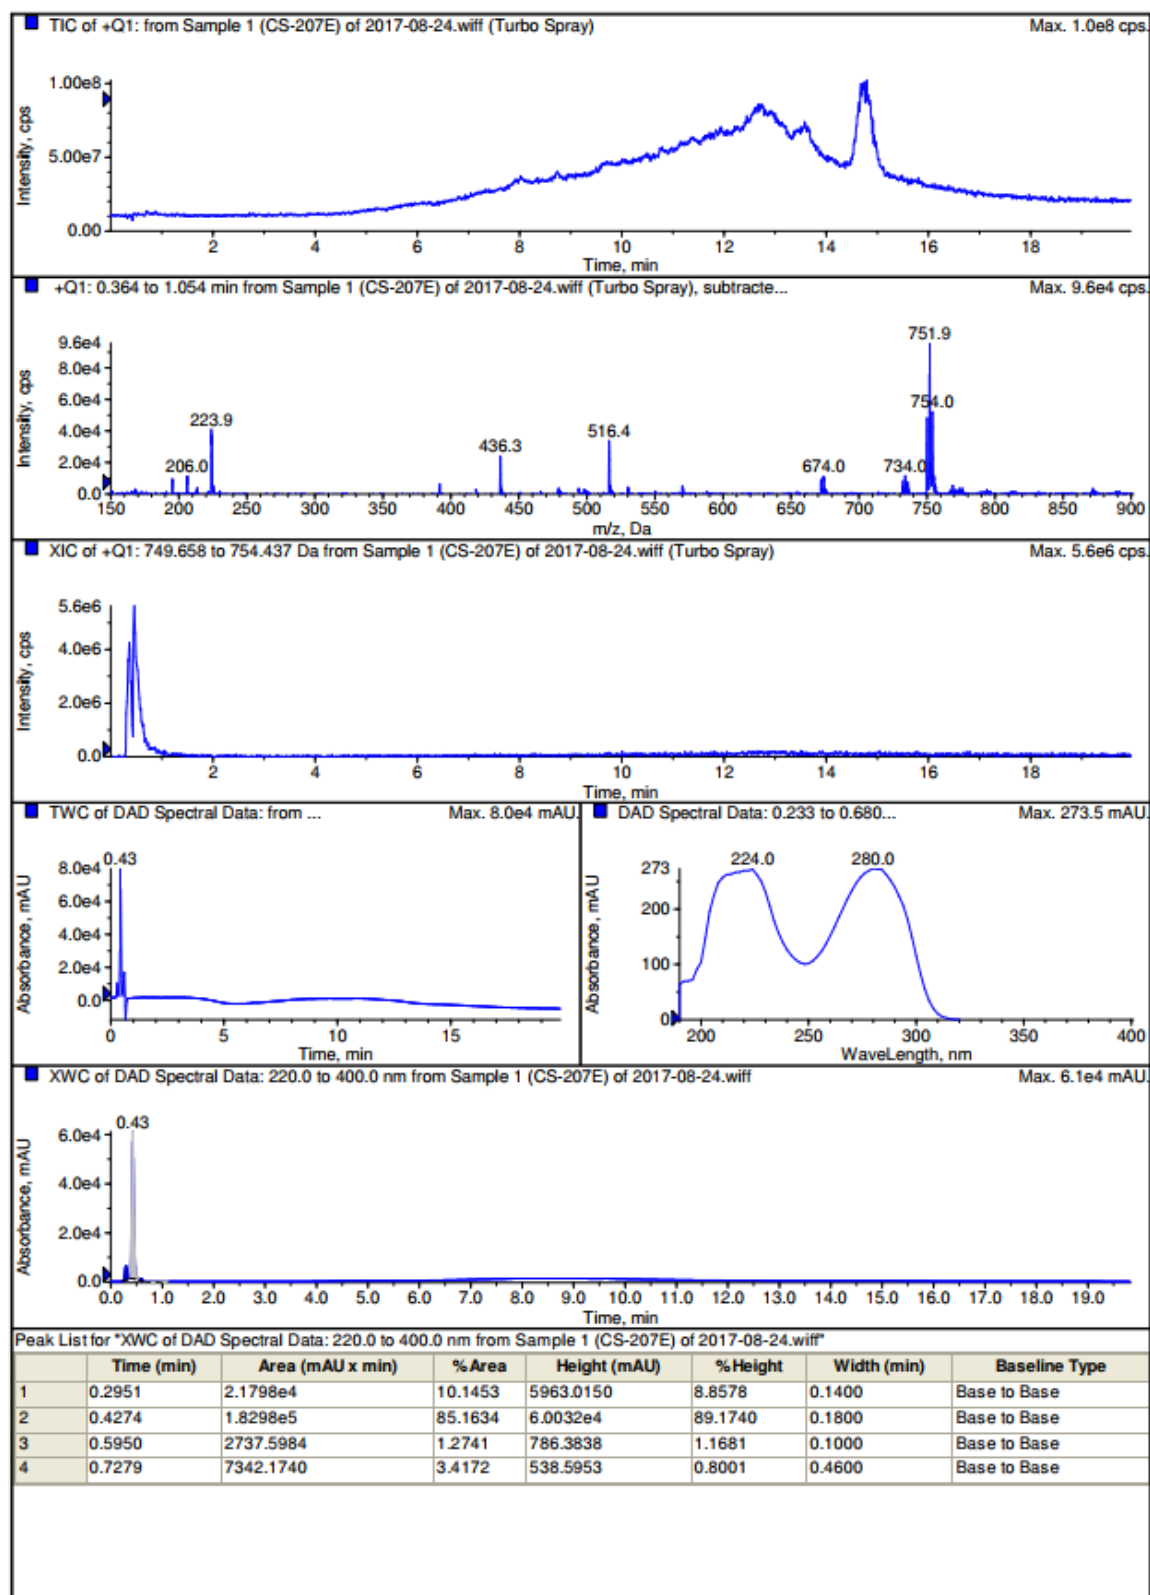

**Figure S4.** LC-MS spectrum of compound **31**. The purity of compound **31** was 100% (the peaks correspond to different protonation states)

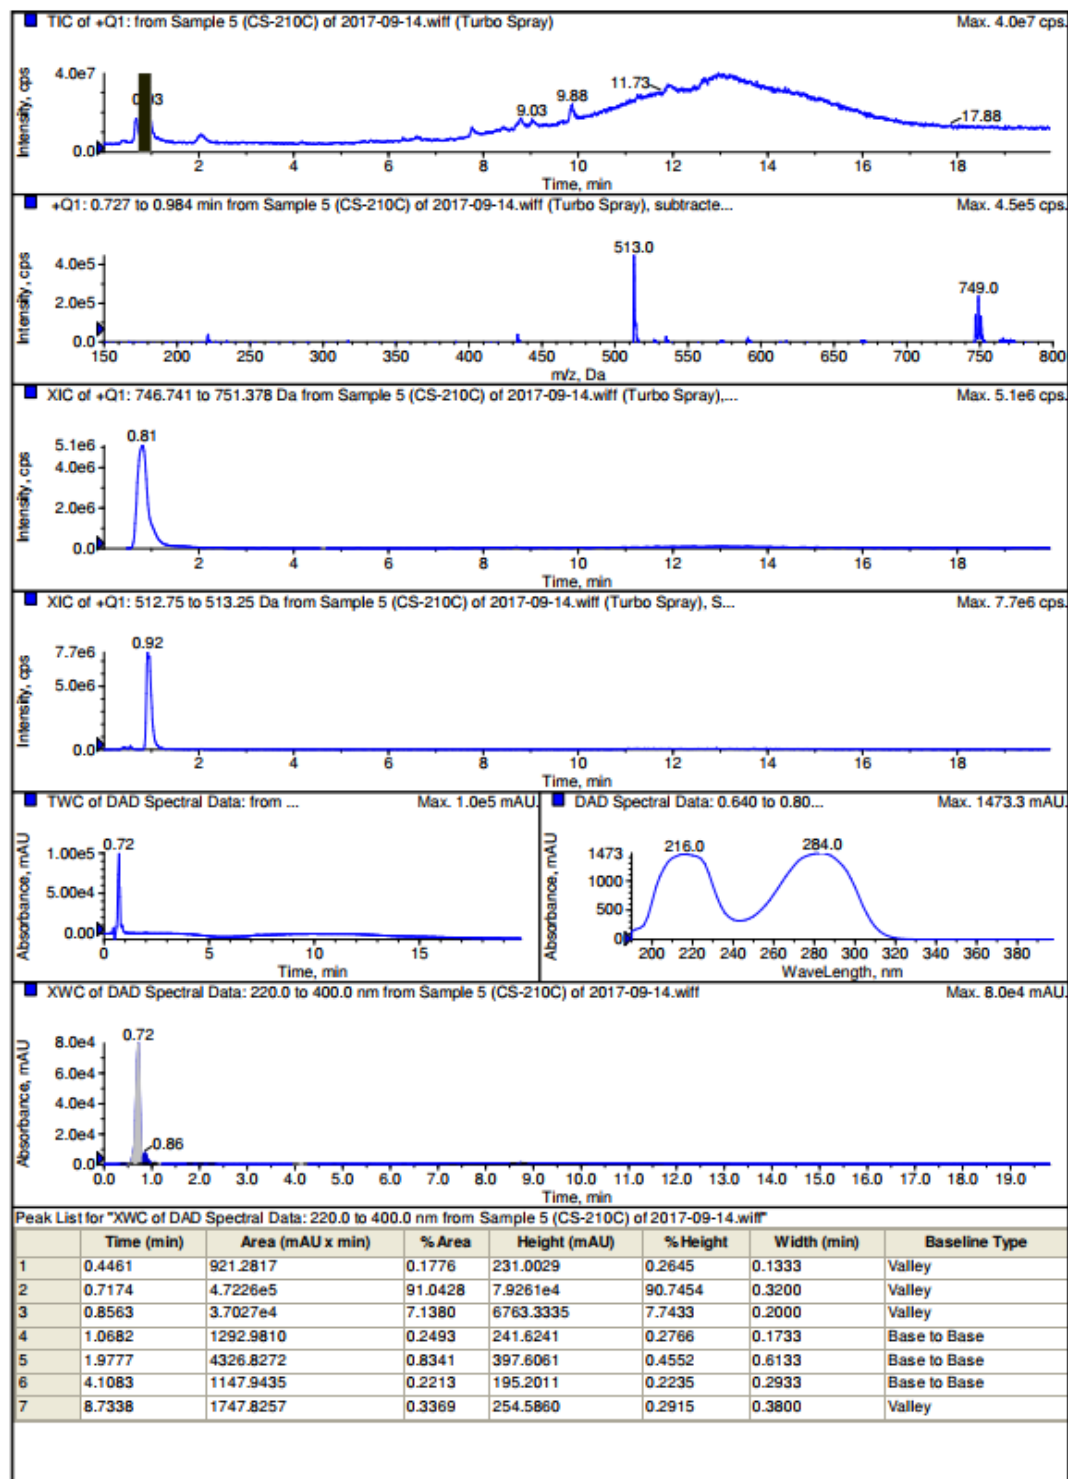

**Figure S5.** LC-MS spectrum of compound **33**. The purity of compound **33** was 99% (the peaks correspond to different protonation state)

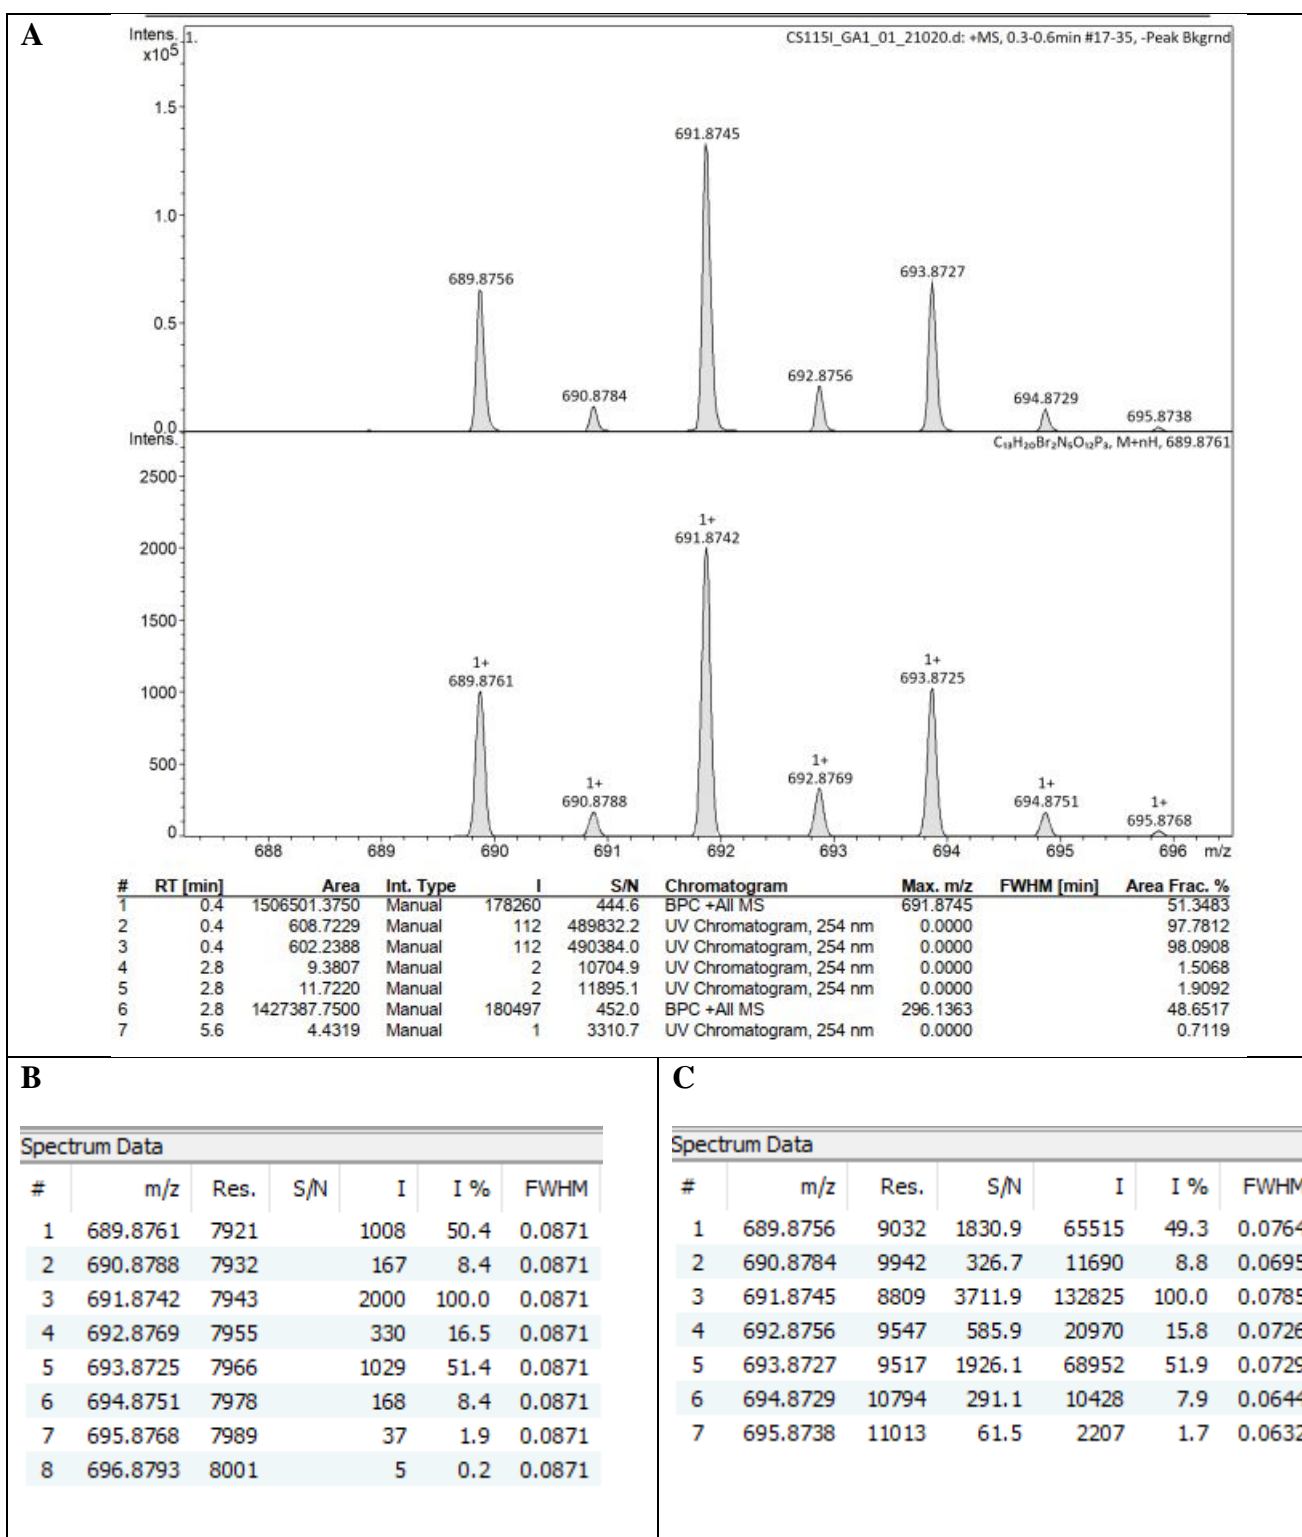

**Figure S6. A.** MS data of isotope distribution pattern of compound **24**. **B.** Calculated and **C.** measured isotope fractions of compound **24**.



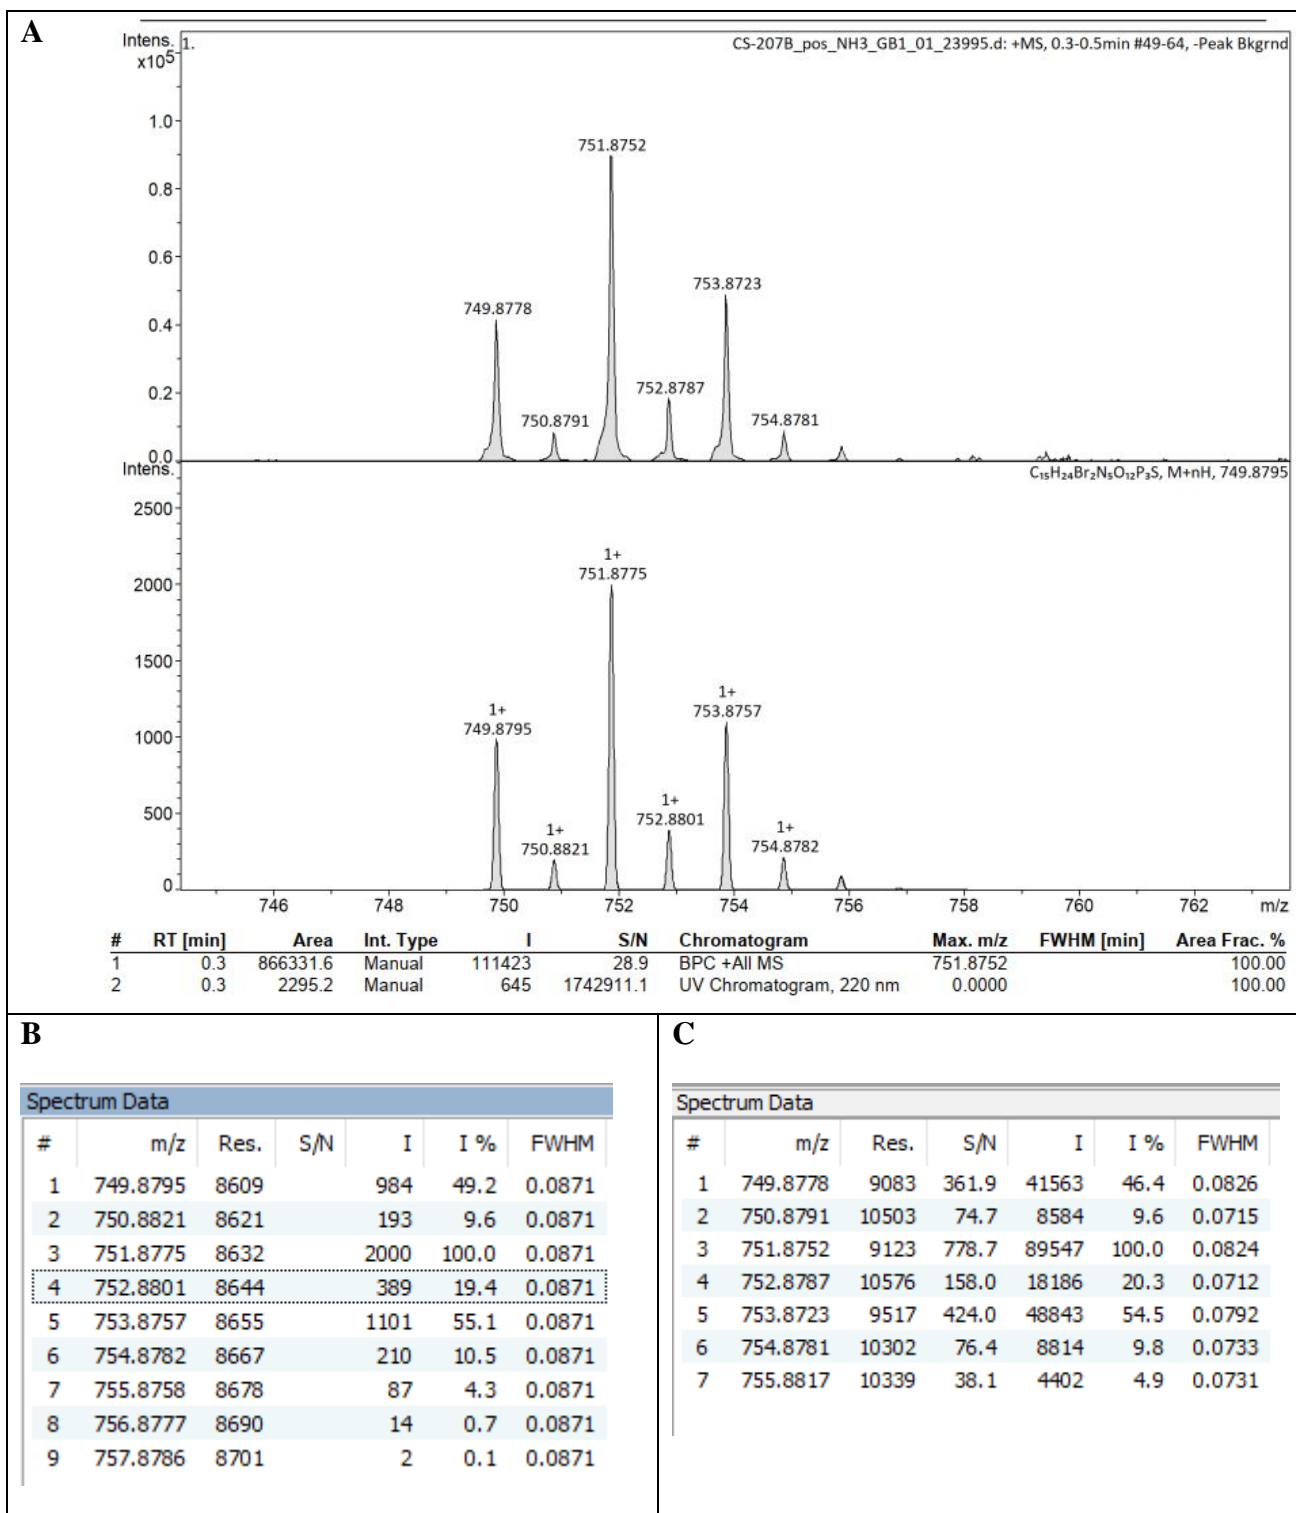

**Figure S7. A.** MS data of isotope distribution pattern of compound **31**. **B.** Calculated and **C.** measured isotope fractions of compound **31**.



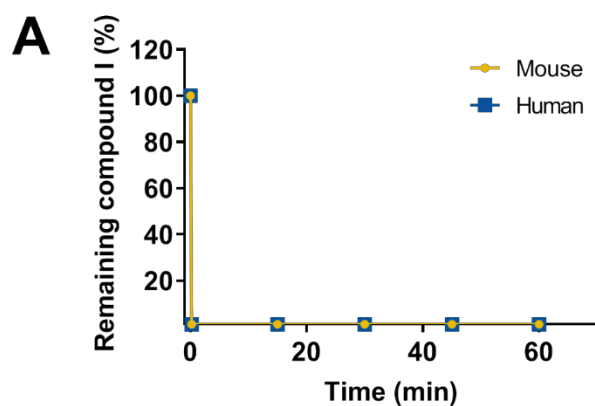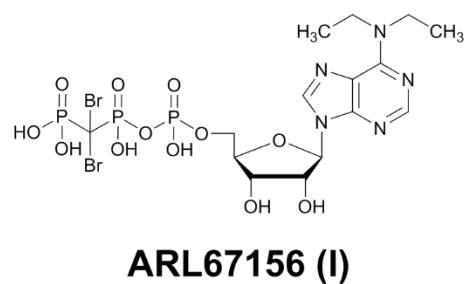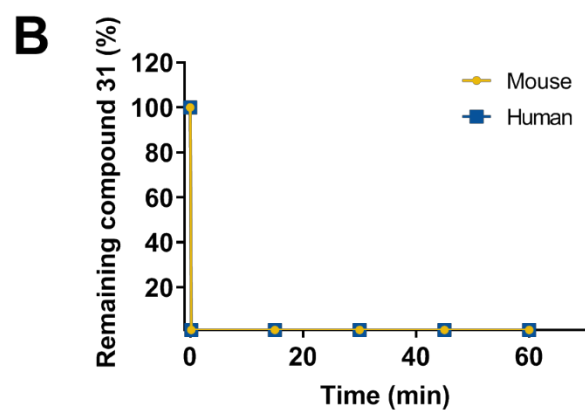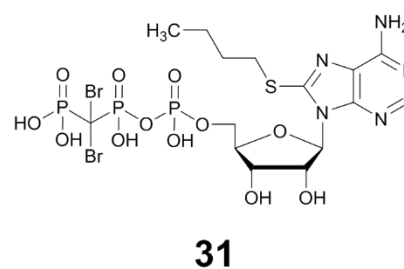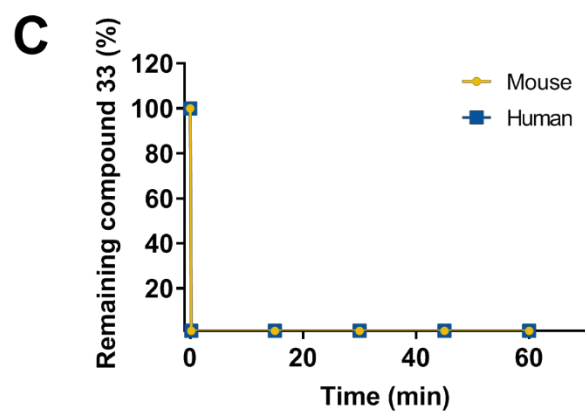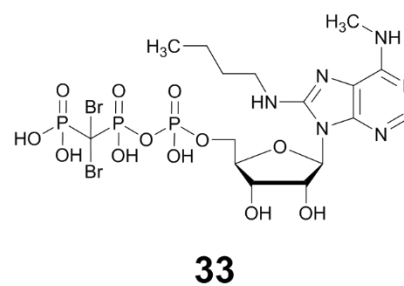

**Figure S8.** Metabolic stability of ARL67156-derived-CD39-inhibitors. Compounds were tested at a concentration of 1  $\mu$ M by Pharmacelsus (Saarbrücken, Germany). Effect of human liver microsomes

(0.5 mg/mL, mixed gender, pooled) on the recovery rate of (A) ARL67156 (I), (B) **31** and (C) **33** determined by LC/ESI-MS analysis.

**A**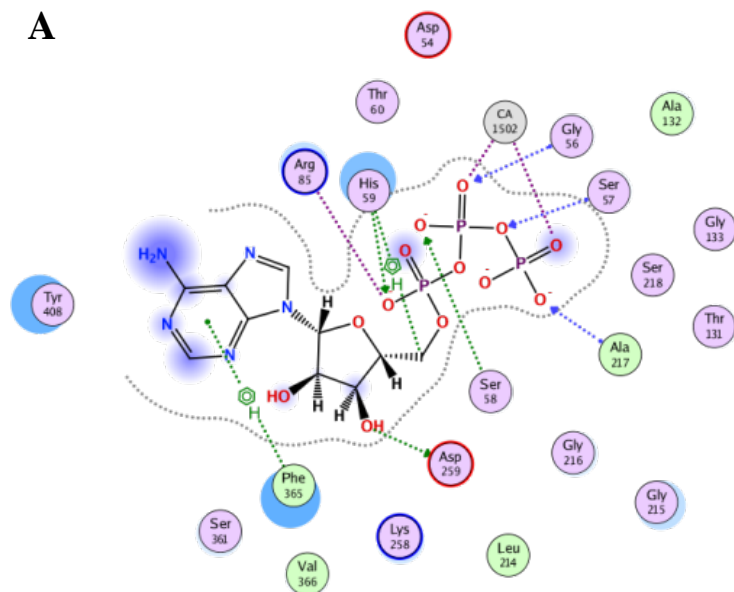**B**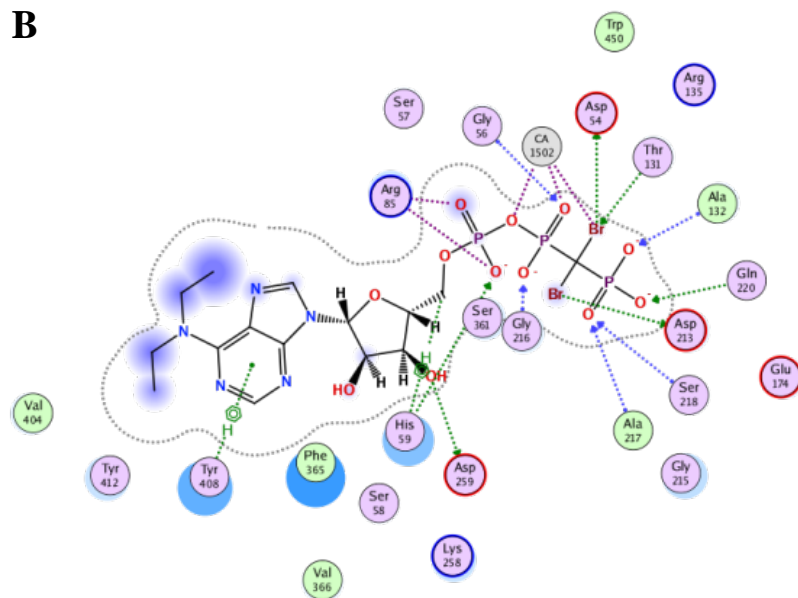

C

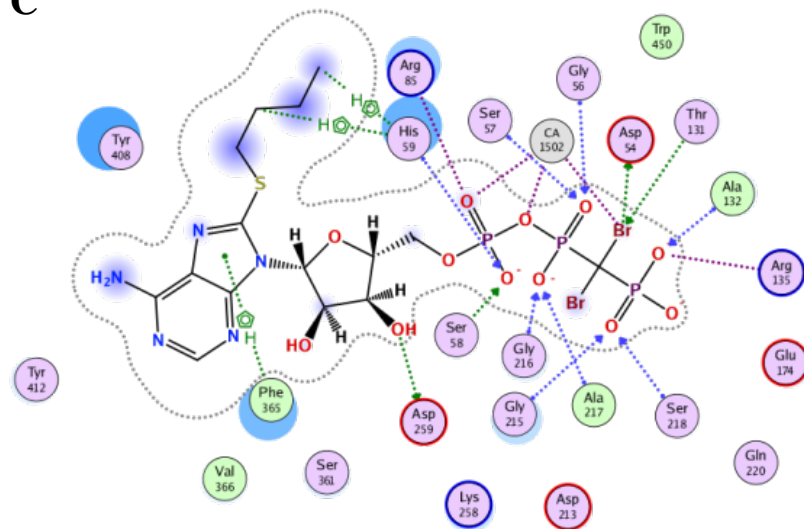

D

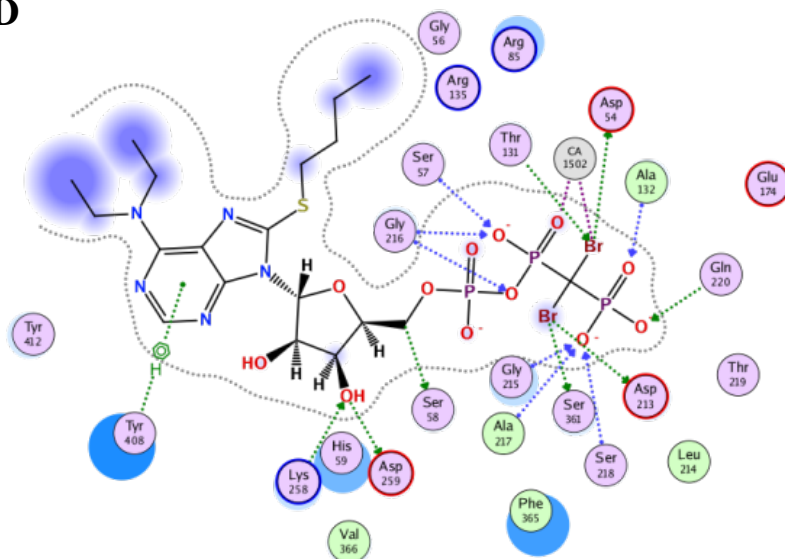

**Figure S9.** 2D-interaction diagram of nucleotides in the binding site of human CD39. **A.** ATP, **B.** ARL67156 (**I**), **C.** inhibitor **31** and **D.** inhibitor **37**

**A**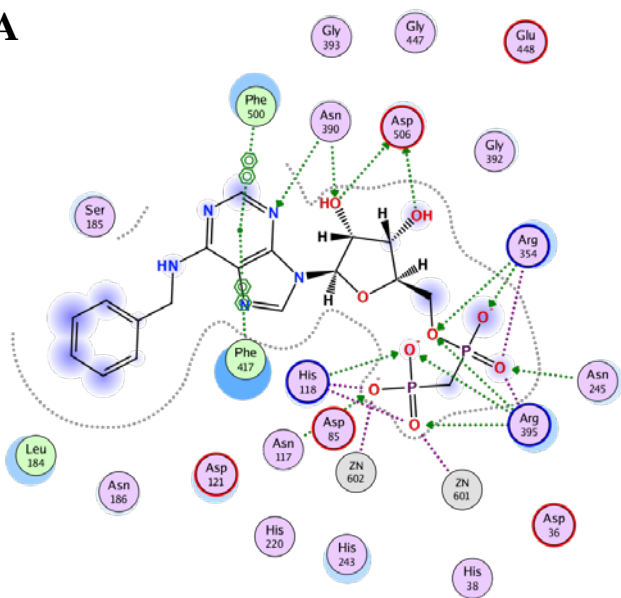**B**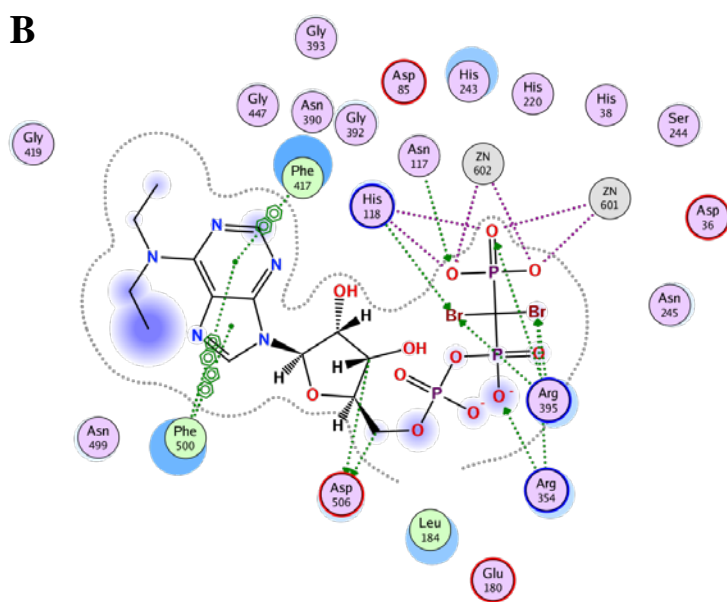

C

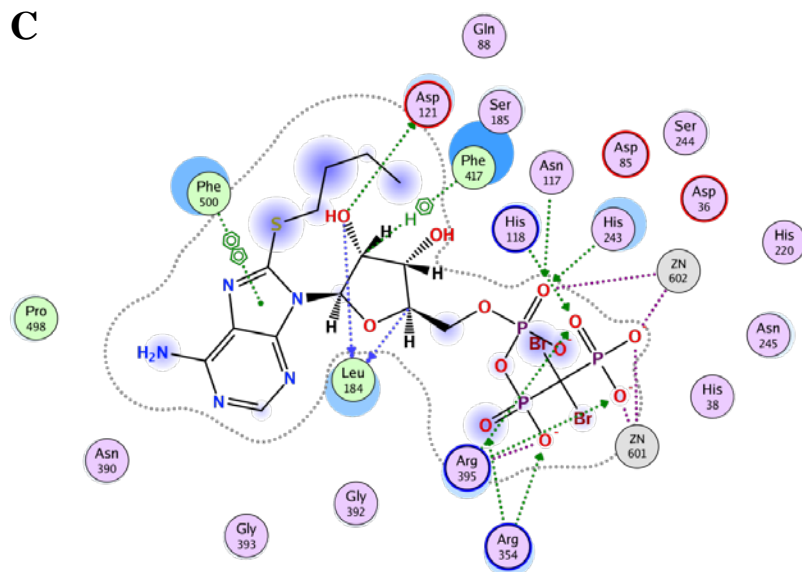

D

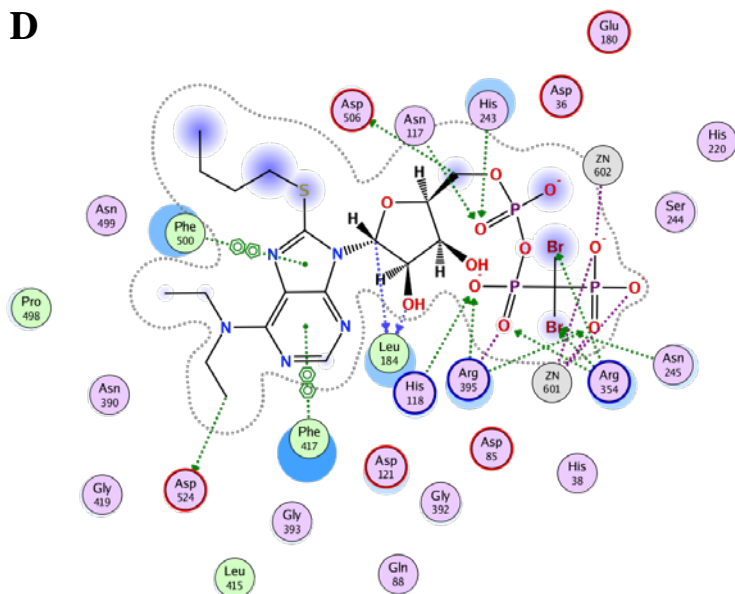

**Figure S10.** 2D-interaction diagram of nucleotides in the binding site of human CD73. **A.** PSB-12379, **B.** ARL67165 (**I**), **C.** inhibitor **31**, and **D.** inhibitor **37**
